# Supplementary material for: Increased Expression of TLR4 in Circulating CD4+T Cells in Patients with Allergic Conjunctivitis and In Vitro Attenuation of Th2 Inflammatory Response by Alpha-MSH
Source: Int J Mol Sci. 2020 Oct 23;21(21):7861. doi: 10.3390/ijms21217861 (PMC7672642; doi:10.3390/ijms21217861)
Supplement: Supplementary file 1 [file ijms-21-07861-s001.zip › Table S1 and S2.xlsx]

## Sheet: Table S1
Study Subject	HD 1		HD2		HD 3		HD 4		HD 5		HD 6		HD 7		HD 8		HD 9		PAC 1		PAC 2		PAC 3		PAC 4		PAC 5		PAC 6		PAC 7		PAC 8		PAC 9		PAC 10		PAC 11		PAC 12		PAC 13		PAC 14
Eye	OI	OD	OI	OD	OI	OD	OI	OD	OI	OD	OI	OD	OI	OD	OI	OD	OI	OD	OI	OD	OI	OD	OI	OD	OI	OD	OI	OD	OI	OD	OI	OD	OI	OD	OI	OD	OI	OD	OI	OD	OI	OD	OI	OD	OI	OD
Age (years)	13		17		12		16		15		20		20 years		14		12		18		12		11		9		11		13		14		12		10		8		10		10		9		10
Sex	F		F		M		F		M		F		M		M		M		M		F		M		M		M		M		M		F		F		M		M		M		M		M
Total IgE	39.5		<2.0		25.8		19.2		44		ND		ND		154		59		230		525		329		1595.88		423		330		1253		423		70,66.4		323		164		479		1709		82.2
Itching	0		0		0		0		3		0		0		0		2		1		1		4		3		4		1		4		2		3		2		4		2		4		1
Tearing	0		0		0		0		2		0		0		0		0		0		1		2		4		4		0		4		3		2		0		4		0		0		0
Light Sensitivity	0		2		0		0		2		0		0		0		0		0		1		4		4		3		0		3		1		2		0		0		2		0		4
Gritty Sensation	0		0		0		0		2		0		0		0		0		1		1		4		3		4		1		4		1		4		1		2		2		1		1
Burning Sensation	0		0		0		0		2		0		0		0		0		1		1		4		5		4		0		4		4		4		2		2		2		1		4
Eyelid position and skin aspect	0	0	0	0	0	0	0	0	0	0	0	0	0	0	0	0	0	0	1	1	0	0	1	1	0	0	0	0	1	1	2	2	0	0	3	3	1	1	0	0	0	0	0	0	0	0
Eyelid margin	0	0	0	0	0	0	0	0	0	0	0	0	0	0	0	0	0	0	1	1	0	0	2	2	0	0	0	0	0	0	3	3	2	2	1	1	0	0	1	1	0	0	0	0	0	0
Conjunctiva hyperemia and swelling	0	0	0	0	0	0	0	0	1	1	0	0	0	0	0	0	1	1	0	0	2	2	1	1	0	0	1	1	0	0	2	2	1	1	2	2	1	1	3	3	1	1	1	1	0	0
Conjunctiva discharge	0	0	0	0	0	0	0	0	0	0	0	0	0	0	0	0	0	0	0	0	0	0	0	0	0	0	1	1	0	0	1	1	1	1	0	0	0	0	1	1	0	0	0	0	0	0
Tarsal conjunctival inflammation response	0	0	0	0	0	0	1	1	1	1	0	0	0	0	0	0	1	1	1	1	2	2	2	3	0	0	3	3	1	1	2	2	3	3	3	3	2	2	3	3	1	1	1	1	1	1
Limbus involvement	0	0	0	0	0	0	0	0	0	0	0	0	0	0	0	0	0	0	0	0	2	2	1	1	0	0	0	0	0	0	3	3	1	1	1	1	0	0	3	3	1	0	0	0	0	0
Cornea Involvement	0	0	0	0	0	0	0	0	0	0	0	0	0	0	0	0	0	0	0	0	1	1	2	3	0	0	0	1	0	0	3	3	0	0	0	1	0	0	0	0	0	0	0	0	0	0
Tear break-up time (TBUT) (s)	6	6	5	7	10	9	2	1	5	8	10	10	7	7	8	12	8	9	8	5	5	6	4	3	4	5	5	6	5	4	3	4	5	6	7	4	6	7	3	5	5	7	6	7	6	6
Schirmer's test (mm)	35	35	28	30	35	35	30	10	28	23	32	5	20	35	14	20	25	25	30	10	25	15	28	23	25	15	35	27	30	10	25	15	35	27	4	6	28	23	8	7	25	15	28	30	25	35
Skin prick test (SPT) (mm) Der p (extract)	0		0		7		0		8		0		0		0		10		5		14		6		5		5		7		5		5		5		10		7		6		9		9

## Sheet: Table S2
Well	RPMI	Der p	LPS	α-MSH	Con A
1	X
2		X
3			X
4				X
5		X	X
6		X		X
7			X	X
8		X	X	X
9					X
